Published by  
**THE AMERICAN  
SOCIETY FOR  
CELL  
BIOLOGY**

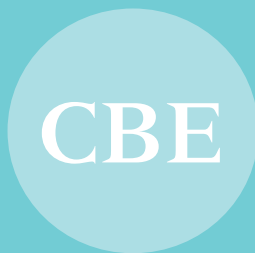

# Life Sciences Education

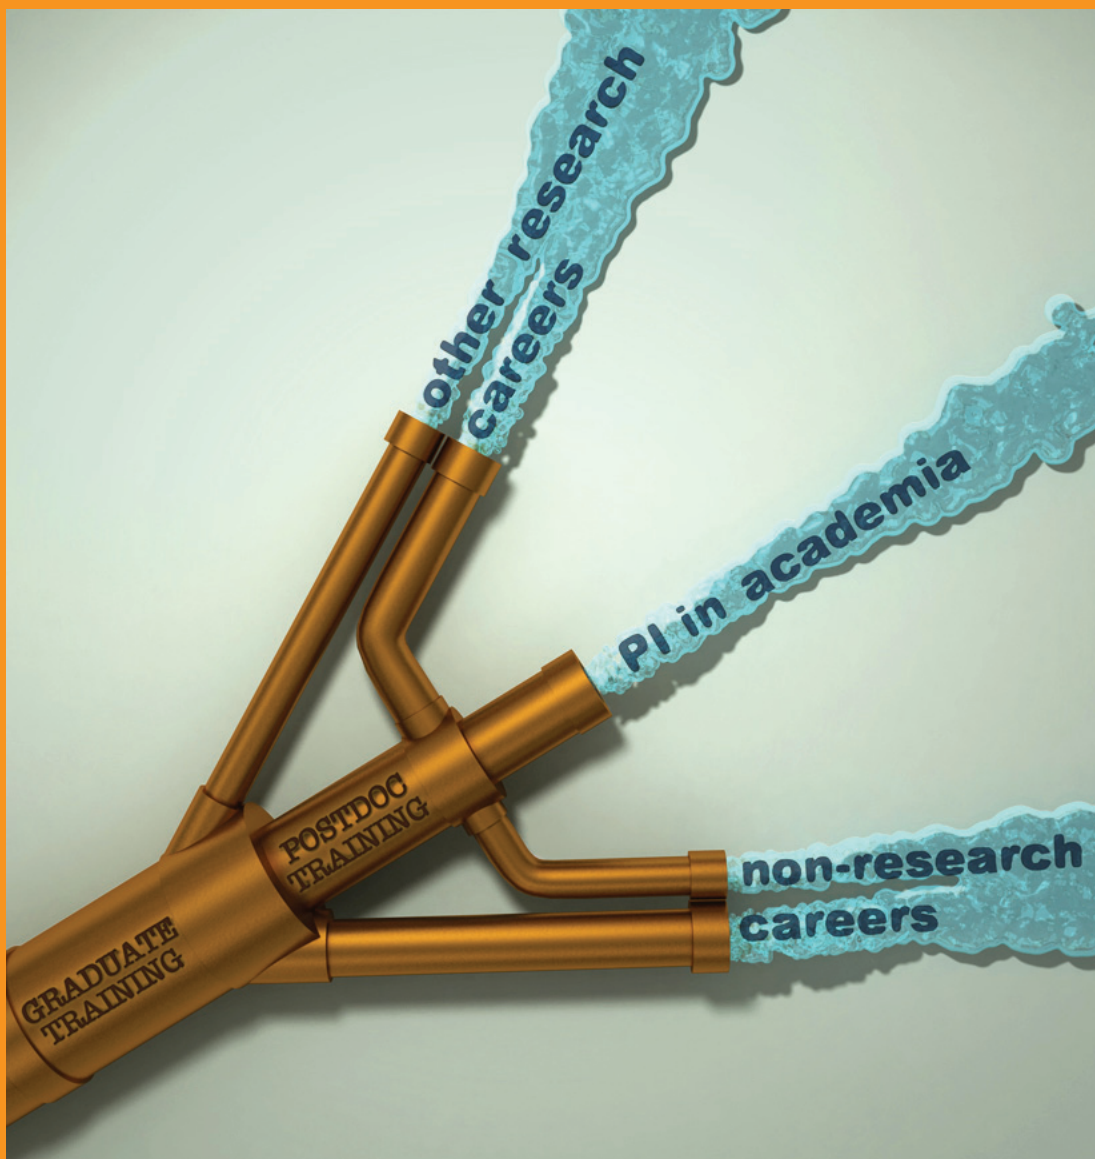

## Branching Career Pipeline
