# Table of Contents

## FEATURES

### *WWW.Life Sciences Education*

#### **Life Sciences Career Exploration**

Louisa A. Stark ..... 231–234

#### *Book Review*

#### **Rebels with a (Biological) Cause**

José Vázquez ..... 235–236

#### *Book Review*

#### **A Life in Science**

Jay Brewster ..... 237–238

## ESSAYS

#### **Improving Graduate Education to Support a Branching Career Pipeline: Recommendations Based on a Survey of Doctoral Students in the Basic Biomedical Sciences**

C. N. Fuhrmann, D. G. Halme, P. S. O’Sullivan, and B. Lindstaedt ..... 239–249

#### **Mentoring Interdisciplinary Undergraduate Students via a Team Effort**

Istvan Karsai, Jeff Knisley, Debra Knisley, Lev Yampolsky, and Anant Godbole ..... 250–258

#### **Teaching Biology through Statistics: Application of Statistical Methods in Genetics and Zoology Courses**

Migdalisel Colon-Berlinger and Patricia A. Burrowes ..... 259–267

## ARTICLES

#### **The Colorado Learning Attitudes about Science Survey (CLASS) for Use in Biology**

Katharine Semsar, Jennifer K. Knight, Gülnur Birol, and Michelle K. Smith ..... 268–278

#### **Classroom-Based Science Research at the Introductory Level: Changes in Career Choices and Attitude**

Melinda Harrison, David Dunbar, Lisa Ratmanský, Kimberly Boyd, and David Lopatto ..... 279–286

#### **Culturally Relevant Inquiry-Based Laboratory Module Implementations in Upper-Division Genetics and Cell Biology Teaching Laboratories**

Dimuth Siritunga, María Montero-Rojas, Katherine Carrero, Gladys Toro, Ana Vélez, and Franklin A. Carrero-Martínez ..... 287–297

#### **Online Teaching Tool Simplifies Faculty Use of Multimedia and Improves Student Interest and Knowledge in Science**

John P. Walsh, Jerry Chih-Yuan Sun, and Michelle Riconscente ..... 298–308

#### **Are Comic Books an Effective Way to Engage Nonmajors in Learning and Appreciating Science?**

Jay Hosler and K. B. Boomer ..... 309–317

#### **A Comprehensive Analysis of High School Genetics Standards: Are States Keeping Pace with Modern Genetics?**

M. J. Dougherty, C. Pleasants, L. Solow, A. Wong, and H. Zhang ..... 318–327

### *On the Cover*

Forty years ago, most PhD-trained scientists moved on to academic careers. Today’s doctoral students pursue a variety of career paths, in academic and nonacademic sectors. A study by Cynthia Fuhrmann and colleagues (p. 239) describes the career preferences of doctoral students in the basic biomedical sciences at the University of California, San Francisco. The study shows that today’s branching career pipeline can be predicted as early as the third year in graduate school, with one-third of students identifying a non-research career path as their first choice. The study has implications for how graduate-level training can be reconsidered to support these realities. Illustration by Janet Iwasa (<http://onem micron.com>).
